# Supplementary material for: Sigma-1 Receptor Promotes Mitochondrial Bioenergetics by Orchestrating ER Ca2+ Leak during Early ER Stress
Source: MDPI journal article supplement (doi:10.3390/metabo11070422), 2021-06-26
Supplement: s1 [file s1]

## Supplementary Materials:

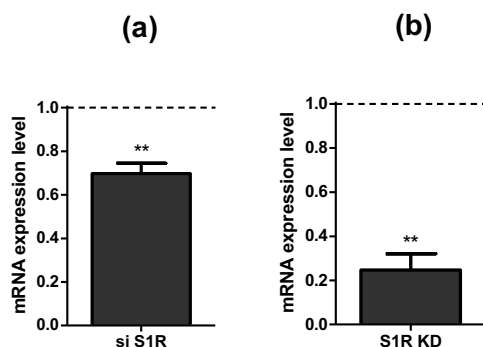

**Figure S1.** Knock-down efficiency of S1R siRNA in unsorted (a) and sorted (b) cells determined by qRT-PCR and normalized to housekeeping gene. Paired t-test, \*\* $p < 0.01$ ,  $n = 5$  (a),  $n = 3$  (b).

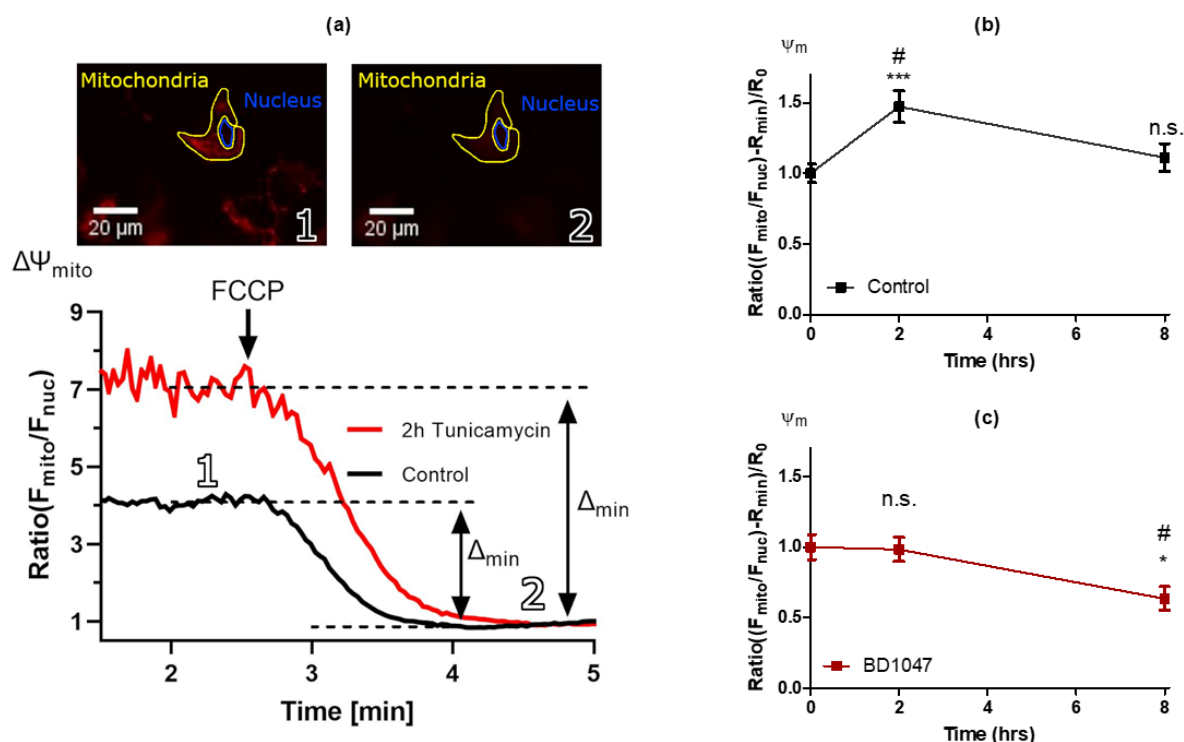

**Figure S2.** Protocol for  $\Psi_m$  measurements and the impact of BD1047 on  $\Psi_m$ . (a) Exemplary images of SH-SY5Y cells stained with TMRM (red) and selected regions of interest (ROI) for mitochondria and nucleus. Experimental protocol used to assess  $\Psi_m$  is shown below for 2 cells, one treated with DMSO (black line) and the other with tunicamycin for 2 hours (red line). Change in the TMRM fluorescence ratio of mitochondrial to nucleus ROI from basal to after FCCP treatment was used to estimate  $\Psi_m$ . Time course of  $\Psi_m$  after tunicamycin treatment, normalized to respective DMSO treated controls and presented as mean  $\pm$  SEM in control (b) and BD1047 treated (c) cells. One-way ANOVA with Tukey's multiple comparison test, \*\*\* $p < 0.001$ , \* $p < 0.05$ , # $p < 0.05$  (2 h tunicamycin against 8 hr tunicamycin), n.s. – not significant; Control DMSO (62 cells/10 experiments), Control 2hr tunicamycin (37 cell/5 experiments), Control 8hr tunicamycin (42 cells/7 experiments), BD1047 DMSO (33 cells/5 experiments), S1R KD 2 h tunicamycin (26 cells/4 experiments), S1R KD 8 h tunicamycin (23 cells/4 experiments);

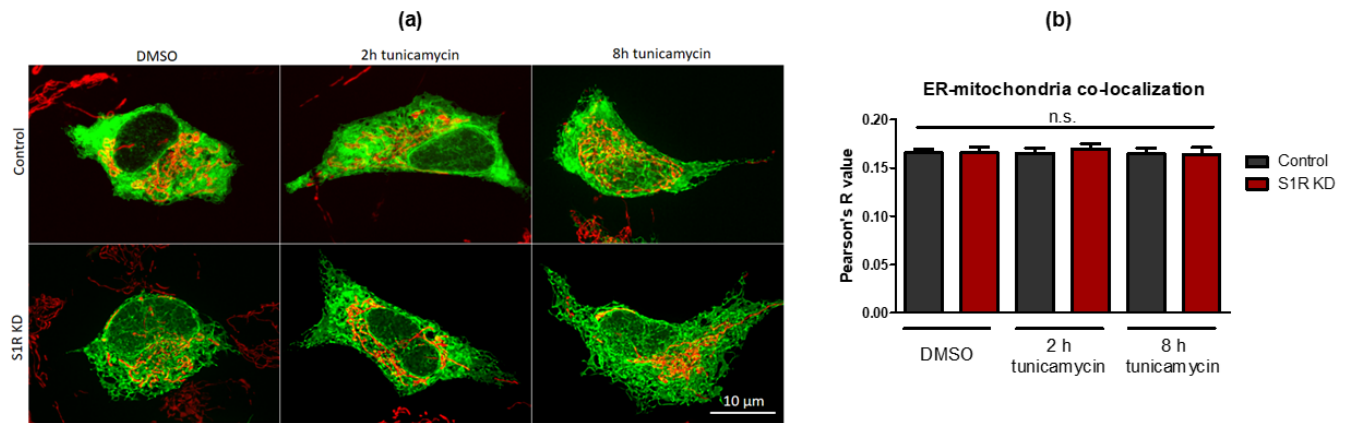

**Figure S3.** Tunicamycin treatment and S1R KD do not affect ER-mitochondria co-localization in SH-SY5Y neuroblastoma cells. **(a)** Representative z-projections of 3D-stacks of SH-SY5Y cells with 200 nm increments are shown; ER is labelled with D1ER (green) and mitochondria with TMRM (red). **(b)** Bar graphs represent MEAN  $\pm$  SEM of ER-mitochondrial co-localization represented by Pearson's R value. One-way ANOVA with Tukey's multiple comparison test, n.s. – not significant; Control DMSO (158 cells/16 experiments), Control 2hr tunicamycin (90 cell/9 experiments), Control 8hr tunicamycin (76 cells/8 experiments), S1R KD DMSO (119 cells/12 experiments), S1R KD 2hr tunicamycin (90 cells/9 experiments), S1R KD 8hr tunicamycin (74 cells/8 experiments).

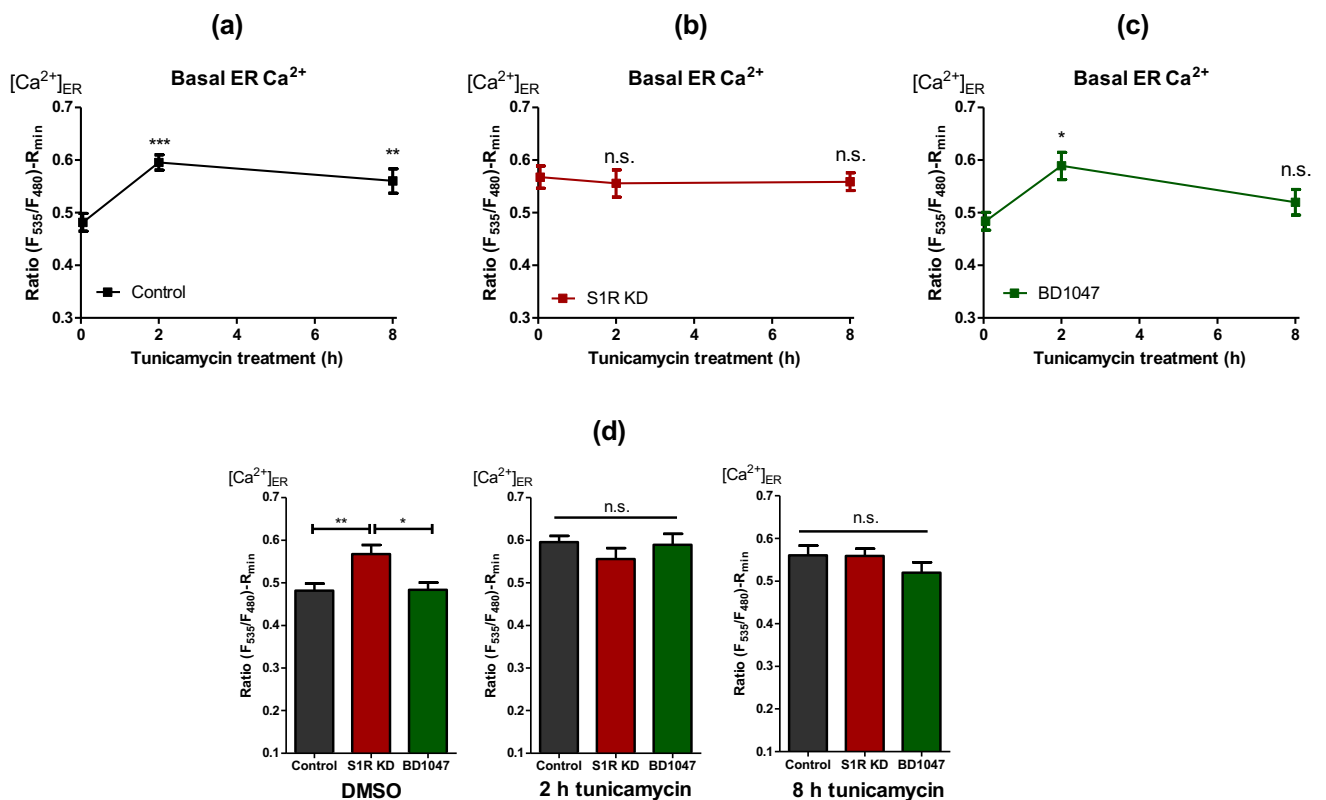

**Figure S4.** Tunicamycin treatment and S1R KD increase the basal ER  $\text{Ca}^{2+}$  level. Time course of ER  $\text{Ca}^{2+}$  level after tunicamycin treatment, presented as mean  $\pm$  SEM and assessed by normalized D1ER ratio in

control SH-SY5Y cells **(a)**, in cells with S1R KD **(b)** and BD1047 treatment **(c)**. Bar graphs represent MEAN  $\pm$  SEM of ER  $\text{Ca}^{2+}$  in control (black), S1R KD (red) and BD1047 treated (green) cells before tunicamycin treatment (left), after 2 h (middle) or 8 h (right) tunicamycin treatment **(d)**. One-way ANOVA with Tukey's multiple comparison test, \*\*\* $p < 0.001$ , \*\* $p < 0.01$ , \* $p < 0.05$ , n.s. – not significant; Control DMSO (43 cells/15 experiments), Control 2hr tunicamycin (44 cell/16 experiments), Control 8hr tunicamycin (38 cells/12 experiments), S1R KD DMSO (19 cells/9 experiments), S1R KD 2hr tunicamycin (27 cells/10 experiments), S1R KD 8hr tunicamycin (19 cells/6 experiments), BD1047 DMSO (23 cells/11 experiments), BD1047 2hr tunicamycin (9 cells/6 experiments), BD1047 8hr tunicamycin (18 cells/6 experiments).

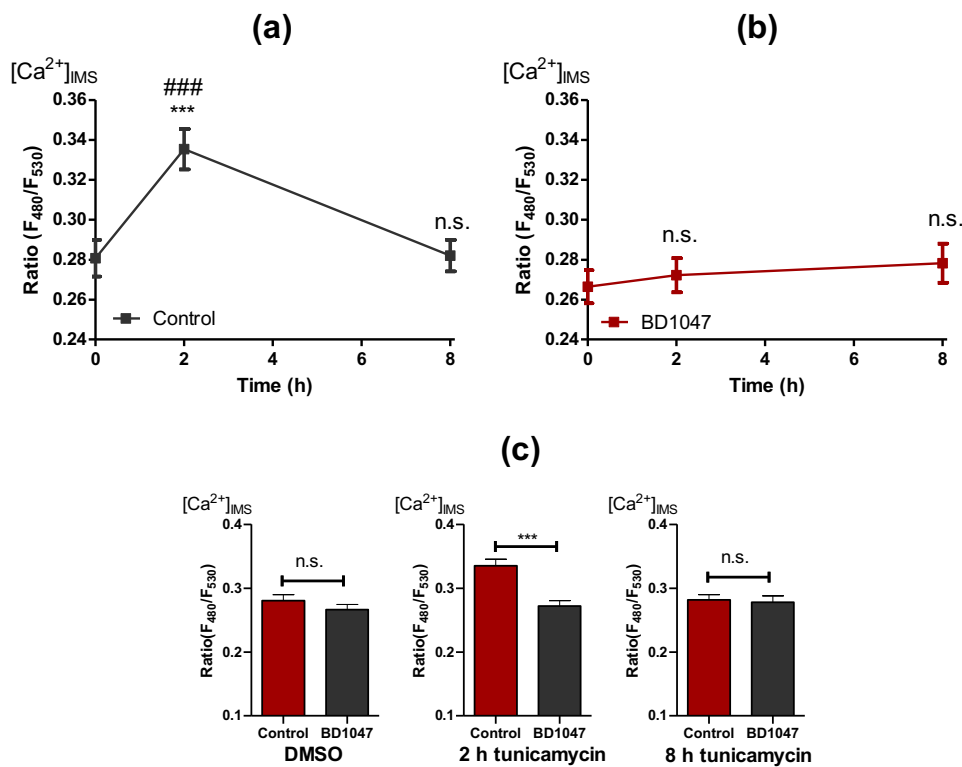

**Figure S5.** Time course of IMS  $\text{Ca}^{2+}$  level after tunicamycin treatment, presented as MEAN  $\pm$  SEM and assessed by IMS-GEM-GECCO ratio in control SH-SY5Y cells **(a)** and in cells treated with BD1047 **(b)**. Bar graphs represent MEAN  $\pm$  SEM of IMS  $\text{Ca}^{2+}$  levels in control (black) and BD1047 treated (red) cells before tunicamycin treatment (left), after 2 h (middle) or 8 h (right) tunicamycin treatment **(c)**. One-way ANOVA with Tukey's multiple comparison test **(a-b)**, \*\*\* $p < 0.001$ , ### $p < 0.001$  (control 2 h tunicamycin against control 8 h tunicamycin), n.s. – not significant; unpaired t-test **(c)**, \*\*\* $p < 0.001$ , n.s. – not significant; Control DMSO (86 cells/9 experiments), Control 2 h tunicamycin (72 cell/8 experiments), Control 8 h tunicamycin (71 cells/8 experiments), BD1047 DMSO (61 cells/7 experiments), BD1047 2 h tunicamycin (71 cells/7 experiments), BD1047 8hr tunicamycin (63 cells/7 experiments).
